# Supplementary material for: Hospital Networks and the Dispersal of Hospital-Acquired Pathogens by Patient Transfer
Source: PLOS journal article supplement (doi:10.1371/journal.pone.0035002), 2012-04-25
Supplement: S2 (10.1371/journal.pone.0035002.s002) [file journal.pone.0035002.s002]

## Saturation of Infectious Relative Indegree (IRI)

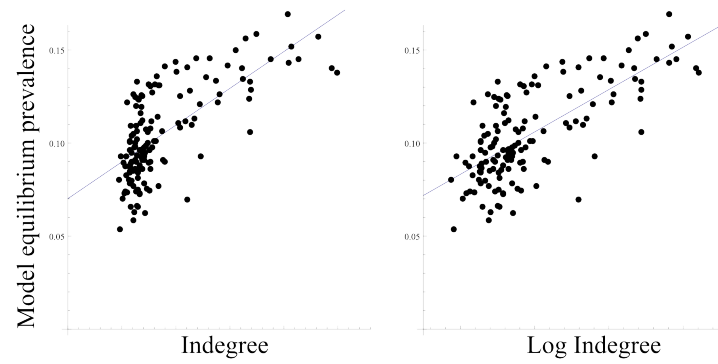

Figure : The relation between IRI and model MRSA equilibrium prevalence, plotted using A) IRI and B) Log IRI. The prevalence shows a stronger positive linear correlation with log IRI than IRI.
